# Supplementary material for: Lithium, sodium and magnesium ion conduction in solid state mixed polymer electrolytes
Source: Royal Society of Chemistry journal article supplement (doi:10.1039/d0cp02609c), 2020-01-01
Supplement: d0cp02609c1.pdf [file d0cp02609c1.pdf]

## Supplementary Information

### **Lithium, sodium and magnesium ion conduction in solid state mixed polymer electrolytes**

Anand B. Puthirath<sup>a†\*</sup>, Thierry Tsafack<sup>a†</sup>, Sudeshna Patra<sup>b</sup>, Pallavi Thakur<sup>b</sup>, Nithya Chakingal<sup>a</sup>, Sreehari K. Saju<sup>a</sup>, Abhijit Baburaj<sup>a</sup>, Keiko Kato<sup>a</sup>, Ganguli Babu<sup>a</sup>, Tharangattu N. Narayanan<sup>b</sup>, and Pulickel M. Ajayan<sup>a\*</sup>

#### **Affiliations**

1. Department of Materials Science and NanoEngineering , Rice University, Houston, USA
2. Tata Institute of Fundamental Research, Hyderabad, Sy No 36/P, Serilingampally Mandal, Gopanapally Village 500107, India

\* **Email for correspondence:** [ajayan@rice.edu](mailto:ajayan@rice.edu), [anandputhirath@rice.edu](mailto:anandputhirath@rice.edu)

† Authors contributed equally

## S1. Sample Preparation Scheme

### Precursor Details :

Li/Na/Mg-ClO<sub>4</sub> (CAS Number 7791-03-9/7601-89-0/10034-81-8 respectively, Sigma- Aldrich)  
 ethanol (CAS Number 64-17-5, Sigma-Aldrich),  
 PEO(average Mw 400,000, CAS Number 25322-68-3, Sigma-Aldrich)  
 PDMS (viscosity 15- 40 mPa.s, CAS Number 63148-57-2)

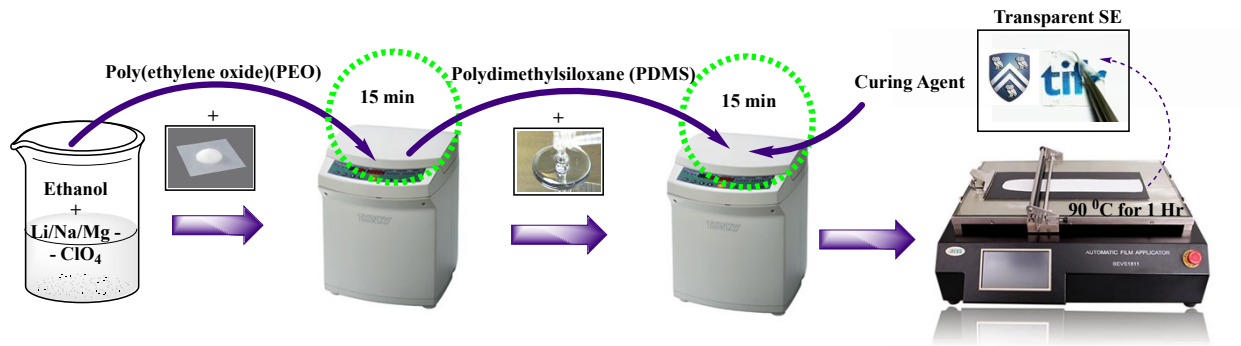

**Figure 1.** Making of the transparent and flexible multi cation channel (MCC). A transparent flexible MCC is shown in the last segment where the “Rice/ tiff“ logos are seen underneath the MCC which is held using a tweezer.

**Table 1** Composition of precursors in each sample

| Sample        | (mg)                    | Ethanol<br>( $\mu$ L) | PEO<br>(mg) | PDMS<br>(mL) | Curing Agent<br>( $\mu$ L) |
|---------------|-------------------------|-----------------------|-------------|--------------|----------------------------|
| PEO -<br>PDMS | -                       | 400                   | 100         | 1            | 400                        |
| Li-TFM        | LiClO <sub>4</sub> -100 | 400                   | 100         | 1            | 400                        |
| Na-TFM        | NaClO <sub>4</sub> -100 | 400                   | 100         | 1            | 400                        |
| Mg-TFM        | MgClO <sub>4</sub> -100 | 400                   | 100         | 1            | 400                        |

|                        |                                                                                                                                                                                                                        |
|------------------------|------------------------------------------------------------------------------------------------------------------------------------------------------------------------------------------------------------------------|
| <p><b>Membrane</b></p> | <p><b>Density</b></p> <p><b>Diameter : 16 mm</b></p> <p><b>Weight : 78.47 mg</b></p> <p><b>Density : Mass/ Volume</b></p> <p style="text-align: center;">0.078</p> <hr/> <p><math>(\pi * (0.8)^2 * 0.027) =</math></p> |
|------------------------|------------------------------------------------------------------------------------------------------------------------------------------------------------------------------------------------------------------------|

1.44 g/cm<sup>3</sup>

## S2: Raman & FTIR Spectra

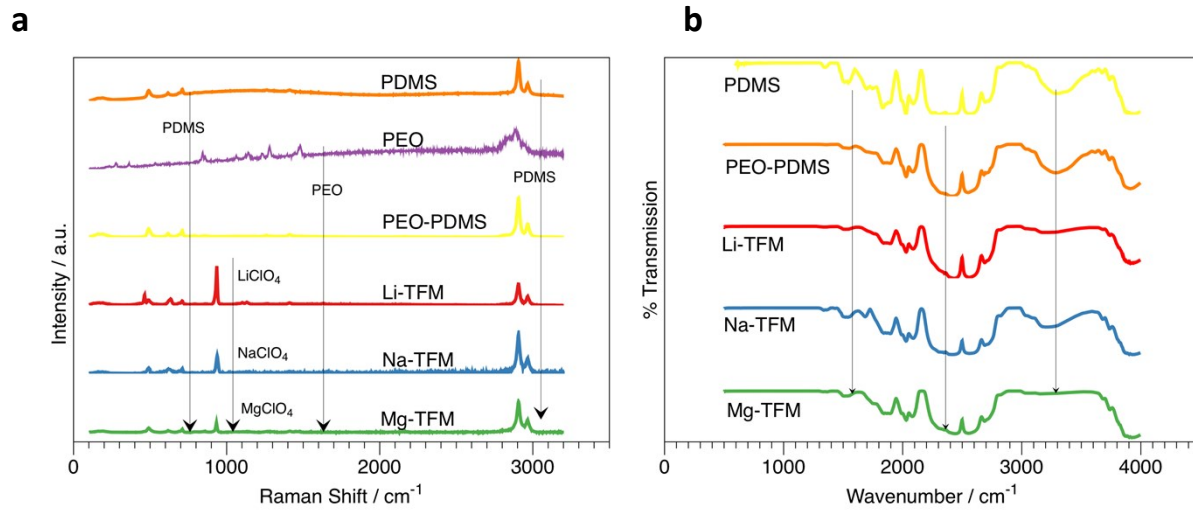

**Figure 2.** (a) Raman Spectra (b) FTIR Spectra

**Table 2** FTIR and Raman band positions of the samples <sup>(1)</sup>

| IR ( $\vartheta/\text{cm}^{-1}$ ) | Assignment                          | Raman ( $\vartheta/\text{cm}^{-1}$ ) | Assignment                                                                                       |
|-----------------------------------|-------------------------------------|--------------------------------------|--------------------------------------------------------------------------------------------------|
| 3400-3600 $\text{cm}^{-1}$        | $\vartheta_p(\text{Si-OH})$         | 2964s                                | $\vartheta_p(\text{C-H})$                                                                        |
| 3400 – 3200 $\text{cm}^{-1}$      | $\vartheta_{PEO}(\text{O-H})$       | 2904vs                               | $\vartheta_p(\text{C-H})$                                                                        |
| 2950 $\text{cm}^{-1}$             | $\vartheta_p(\text{C-H})$           | 709s                                 | $\vartheta_p(\text{C-Si-C})$                                                                     |
| 1600 $\text{cm}^{-1}$             | $\delta\vartheta_{PEO}(\text{O-H})$ | 490s                                 | $\vartheta_p(\text{Si-O-Si})$                                                                    |
| 1500 – 1300                       | $\delta_p(\text{C-H})$              | 1106sr, 850sr and 932sr              | $\gamma_{PEO}(\text{C-H}_2)$ rock, $\vartheta_{LiPEO}(\text{C-O})$ $\vartheta_{PEO}(\text{C-C})$ |
| 800, 1250 $\text{cm}^{-1}$        | $\vartheta_p(\text{Si-CH}_3)$       | 457                                  | Disordered longitudinal acoustic mode (D-LAM)                                                    |

$\vartheta_p$ :PDMS bands  $\vartheta_{PEO}$ : PEO Bands  $\vartheta$ :Stretching  $\delta$ :Bending  $\gamma$ :Rocking s:Strong vs:very strong

### S3 SEM Analysis

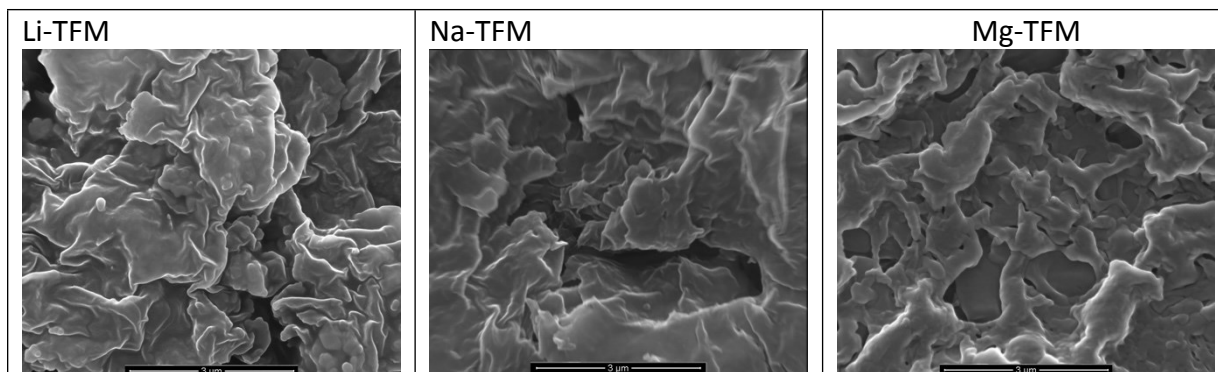

**Figure 3.** SEM images of Li, Na and Mg impregnated polymer matrices

### S4 Contact Angle Experiment Results

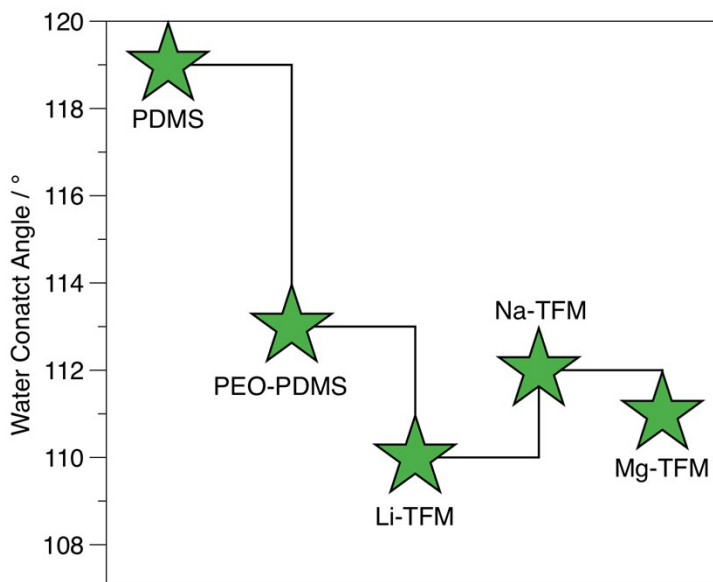

**Figure 4.** The variation of water contact angle from Pristine PDMS to Mg-dissolved membrane. Though the water contact angle is reduced to an extent, the samples surfaces are still hydrophobic which in turn empower the membrane to be in humidity free condition during the operation even in open cell configurations.

## S5 Thermal Analysis

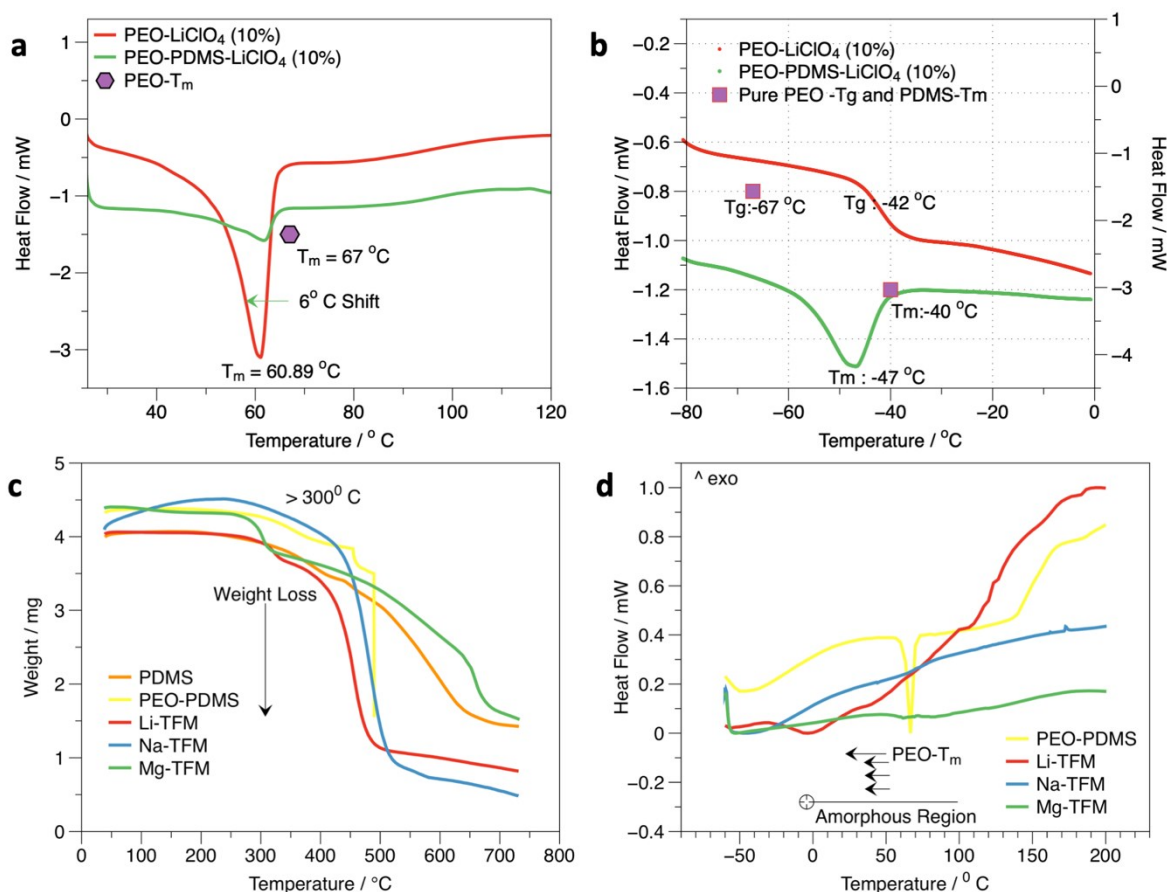

**Figure 5.** (a) & (b) demonstrating the shift in crystalline melting ( $T_m$ ) point and glass transition temperatures ( $T_g$ ) on addition of Li salts (10%, low concentration) in to the polymer matrix. (c) TGA curves of the samples show that all the samples are thermally stable up to 300 °C. Li-PE shows the lowest degradation temperature, then Na-PE and finally Mg-PE. (d) The DSC curves of the various samples validate the shift in crystalline melting temperature on addition of salts and PDMS with PEO. PEO-PDMS structure possess similar  $T_m$  as of PEO while the salted PEO-PDMS structure shows  $T_m$  near to 0°C . This shift in  $T_m$  is helpful in improving the cation conductivity by reducing the chance of crystallisation at room temperature.(1)

## S6 Computational

The optimized configurations converged to a selected few configurations. The most energetically favorable configurations were two charged PDMS-Lithium configurations referred to as  $(\text{HO}[\text{Si}(\text{CH}_3)_2\text{O}]_n\text{H})\text{Li}^+$  in **Figure 1a-b**, two neutral PDMS-Lithium configurations referred to as  $(\text{HO}[\text{Si}(\text{CH}_3)_2\text{O}]_n\text{H})\text{Li}$  in **Figure 1c-d**, one charged PEO-Lithium configuration referred to as  $[\text{HO}(\text{CH}_2\text{CH}_2\text{O})_2\text{H}]\text{Li}^+$  in **Figure 1e**, two neutral PEO-Lithium configurations referred to as  $[\text{HO}(\text{CH}_2\text{CH}_2\text{O})_2\text{H}]\text{Li}$  in **Figure 1f-g**, one charged PDMS-Sodium configuration referred to as  $(\text{HO}[\text{Si}(\text{CH}_3)_2\text{O}]_n\text{H})\text{Na}^+$  in **Figure 1h**, one neutral PDMS-Sodium configuration referred to as  $(\text{HO}[\text{Si}(\text{CH}_3)_2\text{O}]_n\text{H})\text{Na}$  in **Figure 1i**, one charged PEO-Sodium configuration referred to as  $[\text{HO}(\text{CH}_2\text{CH}_2\text{O})_2\text{H}]\text{Na}^+$  in **Figure 1j**, one neutral PEO-Sodium configuration referred to as  $[\text{HO}(\text{CH}_2\text{CH}_2\text{O})_2\text{H}]\text{Na}$  in **Figure 1k**, one charged PDMS-Magnesium configuration referred to as  $(\text{HO}[\text{Si}(\text{CH}_3)_2\text{O}]_n\text{H})\text{Mg}^{2+}$  in **Figure 1l**, one neutral PDMS-Magnesium configuration referred to as  $(\text{HO}[\text{Si}(\text{CH}_3)_2\text{O}]_n\text{H})\text{Mg}$  in **Figure 1m**, one charged PEO-Magnesium configuration referred to as  $[\text{HO}(\text{CH}_2\text{CH}_2\text{O})_2\text{H}]\text{Mg}^{2+}$  in **Figure 1n**, and one neutral PEO-Magnesium configuration referred to as  $[\text{HO}(\text{CH}_2\text{CH}_2\text{O})_2\text{H}]\text{Mg}$  in **Figure 1o**.

Subsequent frequency calculations were performed on all optimized configurations as well as on Li,  $\text{Li}^+$ , Na,  $\text{Na}^+$ , Mg, and  $\text{Mg}^{2+}$ . Temperature-dependent (from 100 K to 1000 K) Gibbs free energies, G, were calculated as the sum of the total electronic energies and thermal free energies. The difference between the free energy of the optimized configurations and the sum of the free energy of the polymer (PDMS or PEO) and the guest species (Li,  $\text{Li}^+$ , Na,  $\text{Na}^+$ , Mg, or  $\text{Mg}^{2+}$ ) taken separately was calculated as a measure of how thermodynamically favorable the reaction between the polymer and the guest species is. In order to determine the reversibility of the reactions, the temperature-dependent equilibrium constants,  $\kappa$ , were calculated as  $\exp(-\Delta G/RT)$ , R being the universal gas constant.

## References

1. Puthirath AB, Patra S, Pal S, Manoj M, Balan AP, Jayalekshmi S, et al. Transparent flexible lithium ion conducting solid polymer electrolyte. *Journal of Materials Chemistry A*. 2017;5(22):11152-62.
